# Supplementary material
Source: publisher figshare collection journal article supplement (https://acs.figshare.com/ndownloader/files/3957862)
Supplement: Supplementary file 1 [file 3957862]

**Supporting Information for**

**Amyloid fibril formation by the chain B subunit of monellin  
occurs by a nucleation-dependent polymerization  
mechanism**

A.T. Sabareesan and Jayant B. Udgaonkar\*

National Centre for Biological Sciences

Tata Institute of Fundamental Research

Bangalore 560065, India

Corresponding author: Professor Jayant B. Udgaonkar

National Centre for Biological Sciences

Tata Institute of Fundamental Research

Bangalore 560065, India

Email: [jayant@ncbs.res.in](mailto:jayant@ncbs.res.in)

Phone: + 91-80-6717-6150

## Supplementary Figures

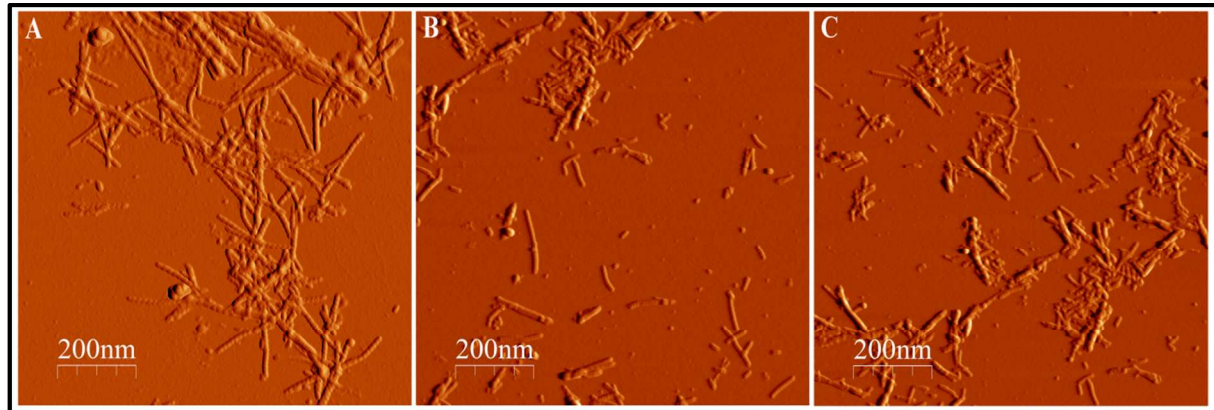

**Figure S1: AFM images of amyloid fibrils formed by 25  $\mu$ M chain B.** AFM images were obtained before sonication (A), after 5 min of sonication (B), and after 24 h of sonication (C). The images are shown in amplitude mode.

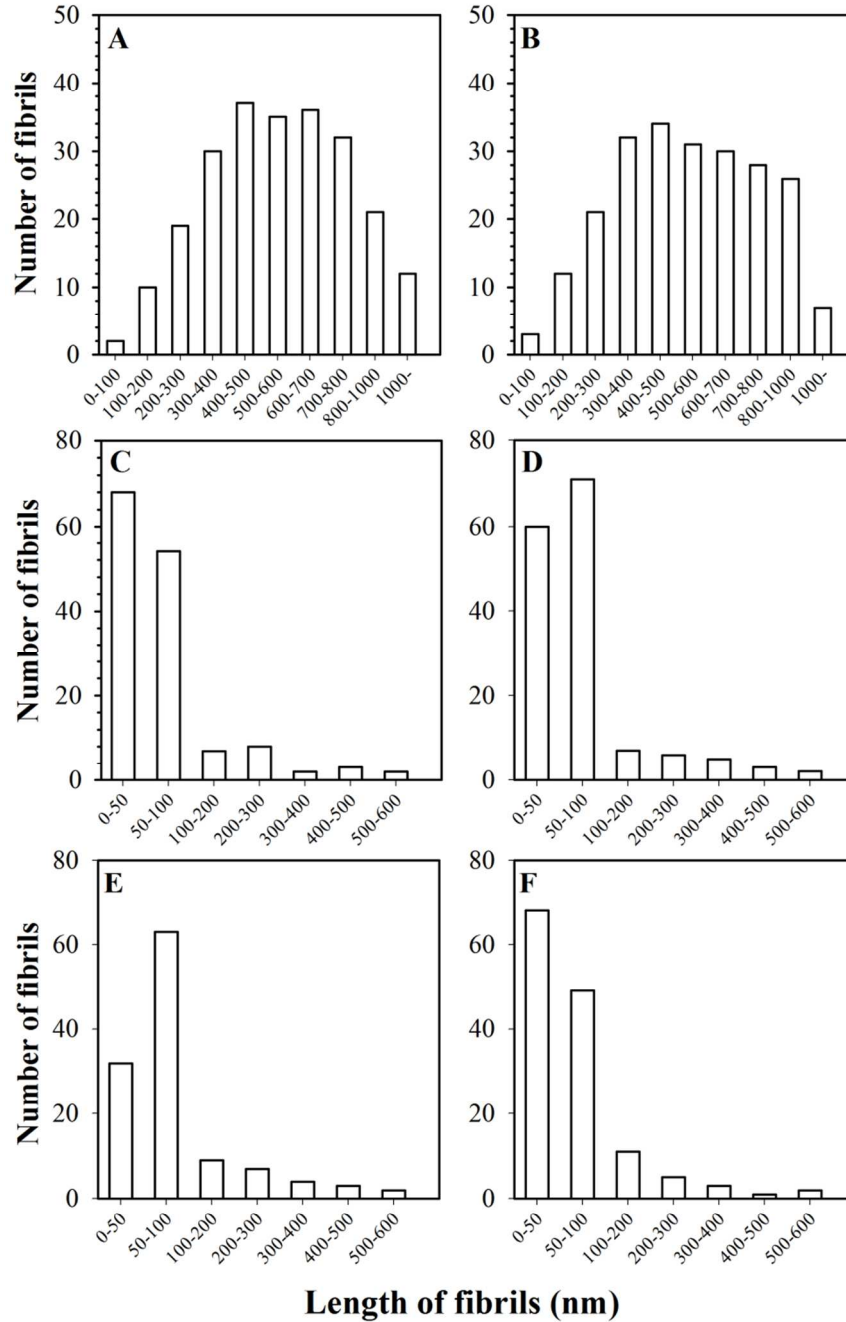

**Figure S2: Analysis of the length distributions of amyloid fibrils formed by 25  $\mu$ M chain B.** Fibrils formed at the end of the chain B aggregation reaction were present either as free fibrils (A) or in clumps (B). Panels C and D show the length distributions of amyloid fibrils after 5 min of sonication, for both free fibrils (C) and clumped fibrils (D). Panels E and F show the length distributions of the sonicated amyloid fibrils after 24 h of incubation under aggregation conditions, for both free fibrils (E) and clumped fibrils (F). It was found that after sonication, fibrils had a greater tendency to be present in clumps.
